# Supplementary material for: Colorimetric biosensing of glucose in human serum based on the intrinsic oxidase activity of hollow MnO2 nanoparticles
Source: Royal Society of Chemistry journal article supplement (doi:10.1039/d0nj02387f), 2020-01-01
Supplement: d0nj02387f1.pdf [file d0nj02387f1.pdf]

## Colorimetric biosensing of glucose in human serum based on the intrinsic oxidase activity of hollow MnO<sub>2</sub> nanoparticles

Lijuan Chen <sup>a,b,c</sup>, Haiyan Gao <sup>a,b,c</sup>, Yan Bai <sup>a,b,c</sup>, Wei Wei <sup>a,b,c</sup>, Junfeng Wang <sup>d</sup>, Georges El Fakhri <sup>d,\*</sup>, and Meiyun Wang <sup>a,b,c,\*</sup>

<sup>a</sup>Department of Medical Imaging, Henan Provincial People's Hospital & People's Hospital of Zhengzhou University, Zhengzhou, Henan, 450003, China.

<sup>b</sup>Henan Key Laboratory for Medical Imaging of Neurological Diseases, Henan Provincial People's Hospital & People's Hospital of Zhengzhou University, Zhengzhou, Henan, 450003, China

<sup>c</sup>School of Clinical Medicine, Henan University, Zhengzhou, Henan, 450003, China.

<sup>d</sup>Gordon Center for Medical Imaging, Radiology, Massachusetts General Hospital, Harvard Medical School, 125 Nashua Street, Boston, MA, 02114

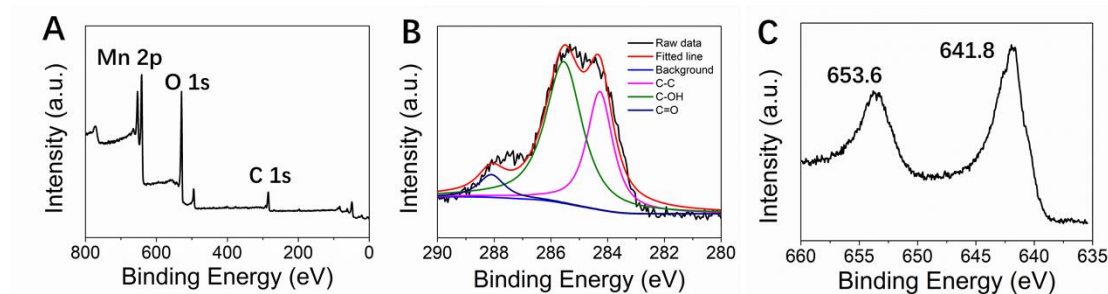

**Fig. S1.** (A) XPS full-scan spectra, (B) high-resolution C 1s and (C) high-resolution Mn 2p XPS spectra of H-MnO<sub>2</sub> NPs.

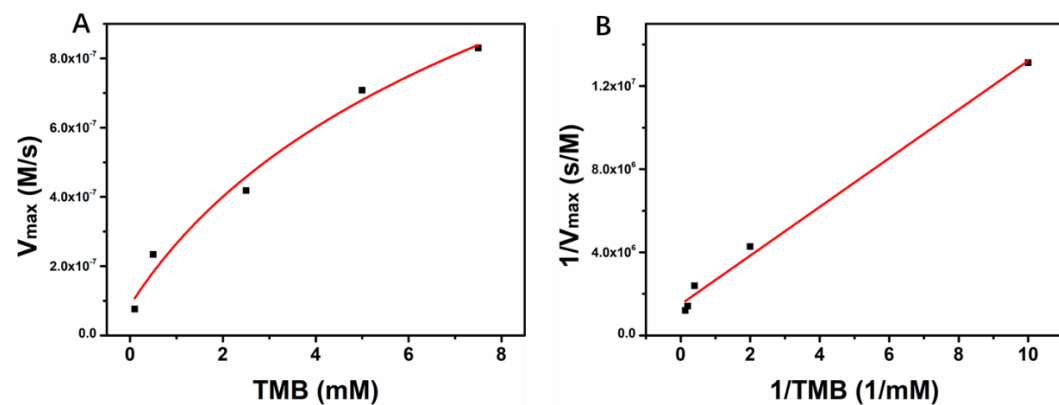

**Fig. S2.** The initial velocities in the oxidization of TMB were measured at pH 4.0. (A) Kinetic plot of  $v$  against TMB concentration. (B) Double-reciprocal plot generated from (A).

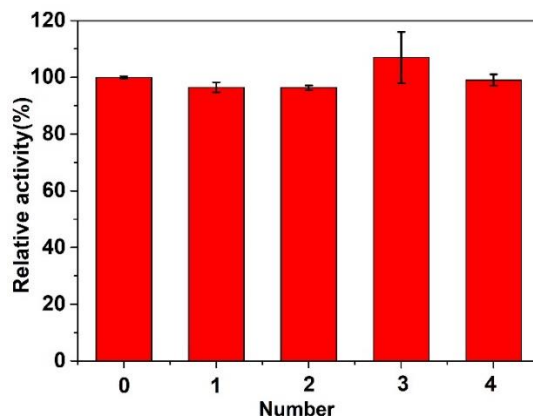

**Fig. S3.** The relative activity of H-MnO<sub>2</sub>. (Number 0 stands for the activity of H-MnO<sub>2</sub> NPs before nearly a year. The Number 1-4 stand for the current activity of H-MnO<sub>2</sub> NPs)

**Table S1.** Comparison of the kinetic parameters between H-MnO<sub>2</sub> NPs and other materials.  $V_{max}$  is the maximum rate of conversion,  $K_m$  is the Michaelis constant.

| Catalyst                              | $K_m$ /mM | $V_{max}/\mu\text{M s}^{-1}$ | Reference |
|---------------------------------------|-----------|------------------------------|-----------|
| H-MnO <sub>2</sub>                    | 0.781     | 0.668                        | This work |
| Fe <sub>3</sub> O <sub>4</sub>        | 0.098     | 0.0344                       | [1]       |
| CeO <sub>2</sub>                      | 3.8       | 0.7                          | [1]       |
| MnO <sub>2</sub> -Silk films          | 1.62      | 2.66                         | [2]       |
| PANi-MnO <sub>2</sub> -Pd NWs         | 0.13      | 0.30                         | [3]       |
| ZnFe <sub>2</sub> O <sub>4</sub> MNPs | 0.85      | 0.13                         | [4]       |
| CuZnFeS NCs                           | 2.2       | 0.39                         | [5]       |

**Table S2.** Comparison of the performance of our method with other biosensors for measuring glucose concentration in human serum samples.

| Biosensor                  | Linear range ( $\mu\text{M}$ ) | LOD ( $\mu\text{M}$ ) | Reference |
|----------------------------|--------------------------------|-----------------------|-----------|
| GOx@ZIF-8(NiPd)            | 10-300                         | 9.2                   | [6]       |
| VS <sub>2</sub> nanosheets | 5-250                          | 1.5                   | [7]       |
| Au NPs                     | 2-200                          | 0.5                   | [8]       |
| GOx-Cu nanoflower          | 10-200                         | 3.5                   | [9]       |
| Carbon dots                | 200-2500                       | 60                    | [10]      |
| H-MnO <sub>2</sub> NPs     | 1-200                          | 0.84                  | This work |

## References

1. Liu X., Wang Q., Zhao H., Zhang L. Su Y., Lv Y., *Analyst*, 2012,137, 4552-4558.
2. Singh M, Bharadwaj K, Dey ES, Dicko C. *Ultrason Sonochem.* 2020, 64,105011.
3. Zhong M., Chi M., Ma F., Zhu Y., Wang C., Lu X., *ACS Sustainable Chem. Eng.* 2018, 6, 12,

- 16482-16492.
4. Ghosh, A. B.; Saha, N.; Sarkar, A.; Dutta, A. K.; Biswas, P.; Nag, K.; Adhikary, B. *New J. Chem.* 2016, 40, 1595-1604.
  5. Wei, H.; Wang, E. *Anal. Chem.* 2008, 80, 2250-2254.
  6. Q. Wang, X. Zhang, L. Huang, Z. Zhang, S. Dong, *Angew. Chem. Int. Ed.*, 2017,56(50):16082-16085.
  7. L. Huang, W. Zhu, W. Zhang, K. Chen, J. Wang, R. Wang, Q. Yang, N. Hu, Y. Suo, J. Wang, *Microchimica Acta*, 2018, 185(1): 1-8.
  8. Y. Jv, B. Li, R. Cao, *Chem. Commun.*, 2010, 46(42): 8017-8019.
  9. B.S. Batule, K.S. Park, S. Gautam, H.J. Cheon, M.I. Kim, H.G. Park, *Sens. Actuators B-Chem.*, 2019, 283,749-754.
  10. B. Wang, F. Liu, Y. Wu, Y. Chen, B. Weng, C.M. Li, *Sens. Actuators B-Chem.*, 2018,255, 2601-2607.
